# Supplementary material for: Association of Increased Programmed Death Ligand 1 Expression and Regulatory T Cells Infiltration with Higher Hepatocellular Carcinoma Recurrence in Patients with Hepatitis B Virus Pre-S2 Mutant after Curative Surgical Resection
Source: MDPI journal article supplement (doi:10.3390/v14061346), 2022-06-20
Supplement: s1 [file s1]

**Table S1. Pre-S2 gene deletion regions of the 21 HBV pre-S2 mutant-positive HCC patients**

| <b>Patient No.</b> | <b>Pre-S2 Gene Deletion Region (%)<sup>a</sup></b> | <b>Deletion Size</b> |
|--------------------|----------------------------------------------------|----------------------|
| 1                  | nucleotides 24-50 (33.801)                         | 27 nucleotides       |
| 2                  | nucleotides 1-54 (11.589)                          | 54 nucleotides       |
| 3                  | nucleotides 1-54 (27.093)                          | 54 nucleotides       |
| 4                  | nucleotides 1-54 (63.181)                          | 54 nucleotides       |
| 5                  | nucleotides 1-51 (11.029)                          | 51 nucleotides       |
| 6                  | nucleotides 1-54 (53.898)                          | 54 nucleotides       |
| 7                  | nucleotides 1-54 (12.523)                          | 54 nucleotides       |
| 8                  | nucleotides 1-57 (10.490)                          | 57 nucleotides       |
| 9                  | nucleotides 1-54 (23.226)                          | 54 nucleotides       |
| 10                 | nucleotides 1-54 (10.226)                          | 54 nucleotides       |
| 11                 | nucleotides 1-54 (26.027)                          | 54 nucleotides       |
| 12                 | nucleotides 1-15 (11.710)                          | 15 nucleotides       |
| 13                 | nucleotides 1-54 (51.071)                          | 54 nucleotides       |
| 14                 | nucleotides 15-56 (33.789)                         | 42 nucleotides       |
| 15                 | nucleotides 1-57 (22.473)                          | 57 nucleotides       |
| 16                 | nucleotides 1-54 (15.565)                          | 54 nucleotides       |
| 17                 | nucleotides 1-54 (39.358)                          | 54 nucleotides       |
| 18                 | nucleotides 1-54 (38.244)                          | 54 nucleotides       |
| 19                 | nucleotides 1-54 (13.399)                          | 54 nucleotides       |
| 20                 | nucleotides 1-54 (23.550)                          | 54 nucleotides       |
| 21                 | nucleotides 1-57 (20.926)                          | 57 nucleotides       |

<sup>a</sup>The pre-S2 gene deletion region with the highest frequency in each patient was shown.
